# Supplementary material for: A CoHCF system with enhanced energy conversion efficiency for low-grade heat harvesting
Source: Royal Society of Chemistry journal article supplement (doi:10.1039/c9ta02426c), 2019-01-01
Supplement: c9ta02426c1.pdf [file c9ta02426c1.pdf]

## Supplementary Information

# CoHCF System with Enhanced Energy Conversion Efficiency for Low-grade Heat Harvesting

Jing Jiang,<sup>†a</sup> Hanqing Tian, <sup>†a</sup> Xinrui He, <sup>†a</sup> Qing Zeng,<sup>a</sup> Yi Niu,<sup>a</sup> Ting Zhou,<sup>a</sup> Yuan Yang,<sup>b\*</sup> Chao Wang<sup>a\*</sup>

<sup>a</sup> Clean Energy Materials and Engineering Center, School of Electronic Science and Engineering, State Key Laboratory of Electronic Thin Film and Integrated Devices, University of Electronic Science and Technology of China, Chengdu, Sichuan, China.

<sup>b</sup> Program of Materials Science and Engineering, Department of Applied Physics and Applied Mathematics, Columbia University, New York, New York 10025, United State.

Yuan Yang (yy2664@columbia.edu)

Chao Wang ([cwang@uestc.edu.cn](mailto:cwang@uestc.edu.cn))

\*Corresponding author.

<sup>†</sup>These authors contributed equally to this work

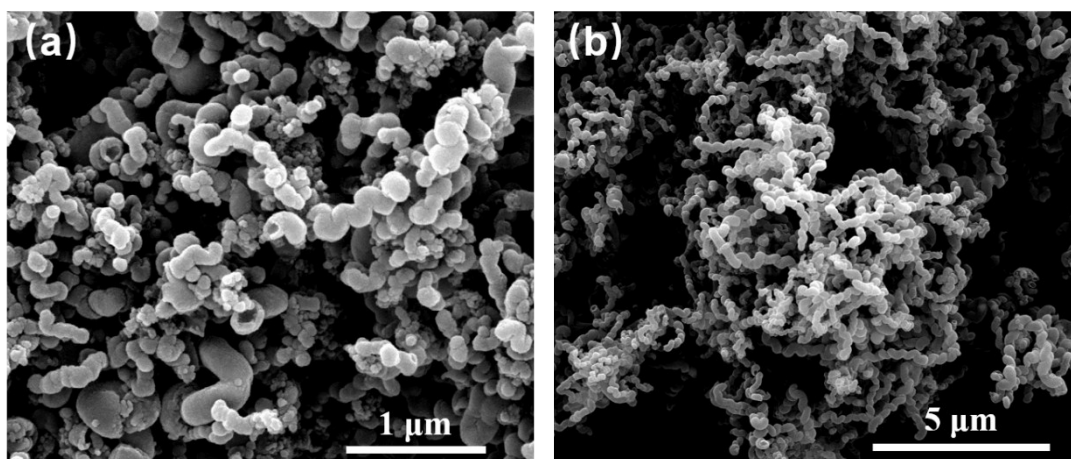

**Figure S1** SEM images of HCNTs

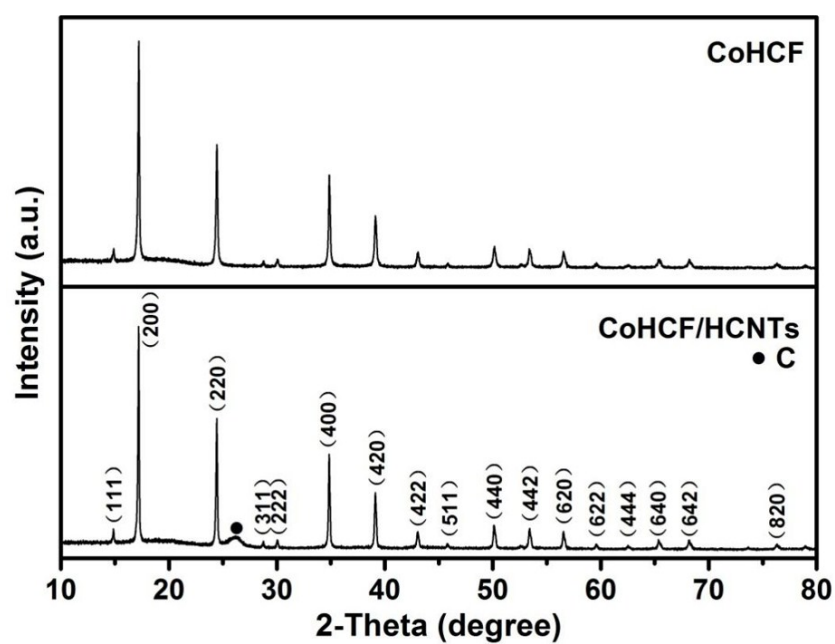

**Figure S2.** XRD patterns of as-prepared CoHCF and CoHCF/HCNTs composite.

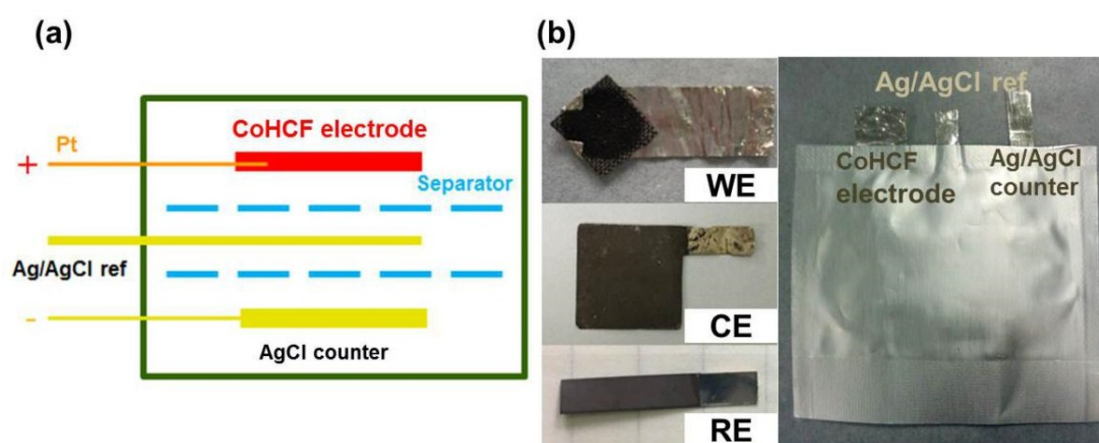

**Figure S3.** The pouch cell configuration used in electrochemical measurements. (a) Schematic of the pouch cell, (b) Optical images of TREC electrodes and fabricated cell.

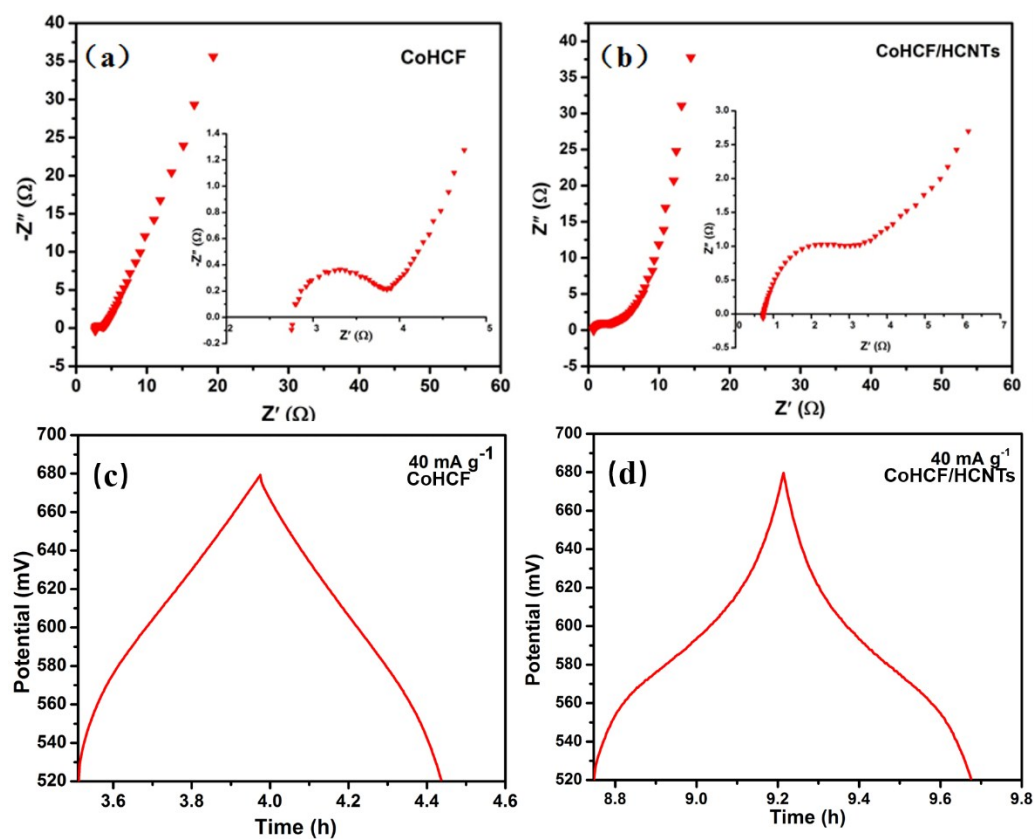

**Figure S4.** Nyquist spectra of (a) CoHCF electrode and (b) CoHCF/HCNTs electrode (inset shows the magnified), GCD curves of the (c) pure CoHCF and (d) CoHCF/HCNTs electrode.

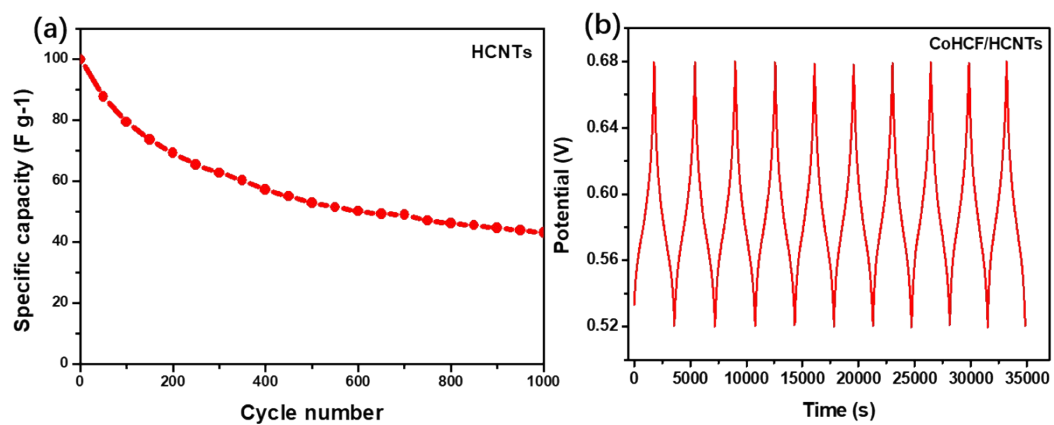

**Figure S5** Cycling stability of (a) HCNTs and (b) CoHCF/HCNTs

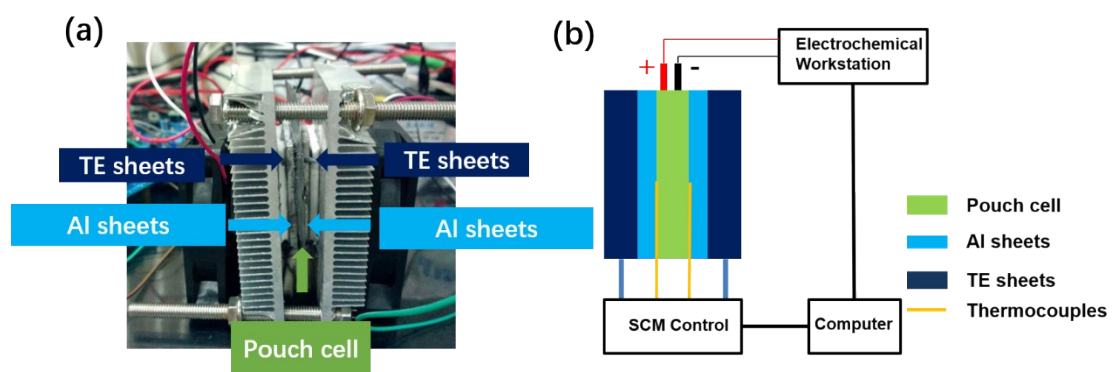

**Figure S6** The home-made thermal cycler for temperature measurement and thermal cycling. (a) A camera image of the setup, (b) The structure of the system.

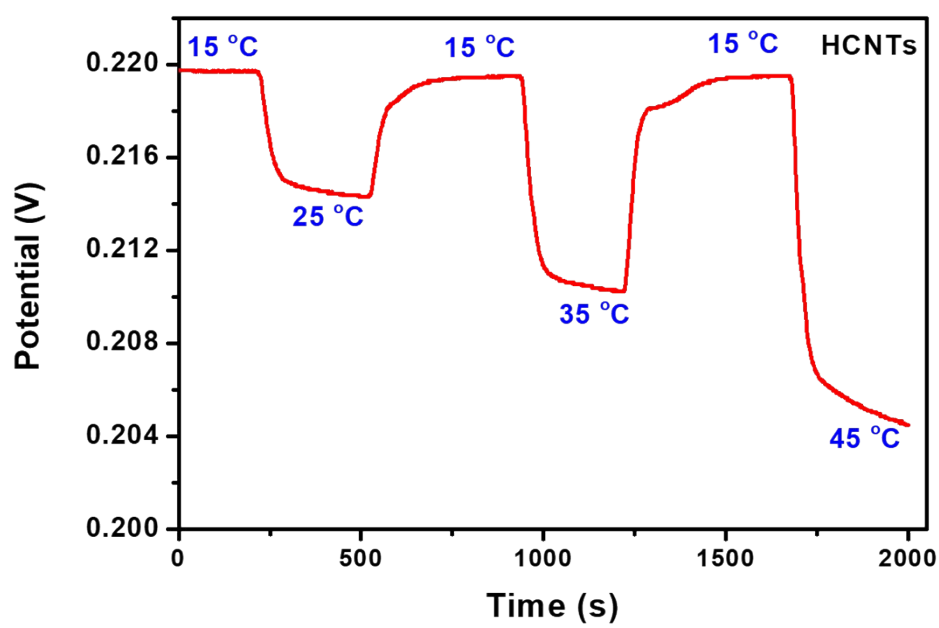

**Figure S7.** The real time measurement of temperature coefficient of HCNTs

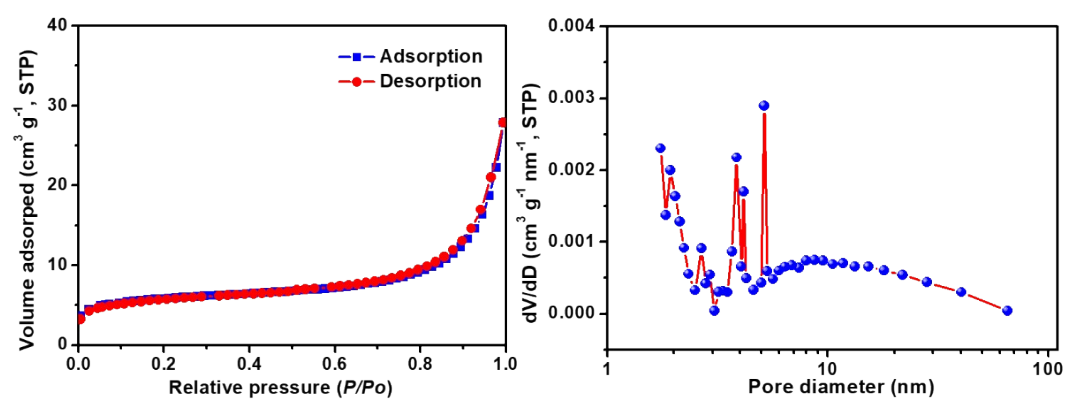

**Figure S8**  $N_2$  adsorption/desorption isotherms of HCNTs and the corresponding pore size distributions.

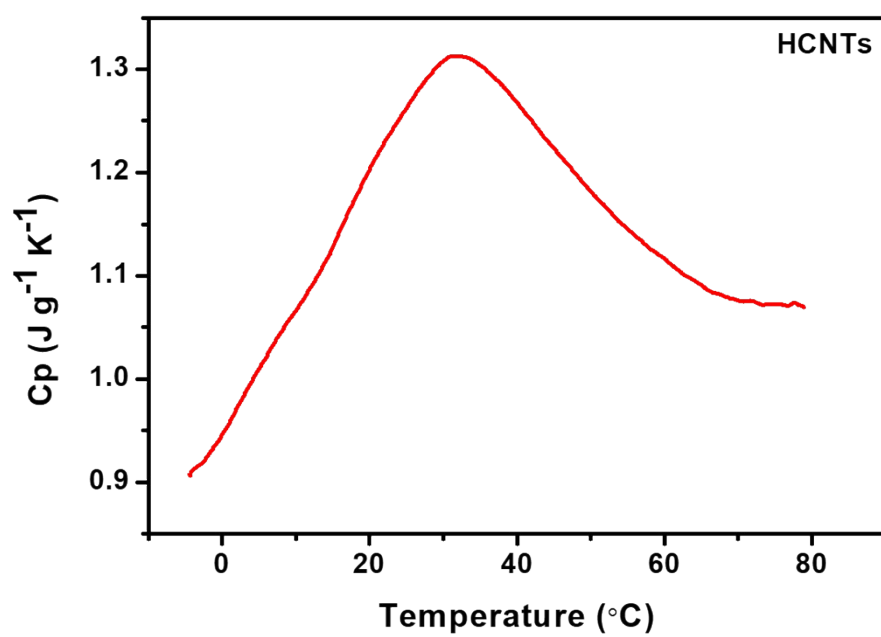

**Figure S9.** The specific heat of pure HCNTs

## Supplementary Note: Calculation on the experiment efficiency of TRECs:

In this note, we are going to explain how experiment efficiency is calculated.

According to the formula:

$$W = Q_{\text{dis}} V_{\text{dis}} - Q_{\text{ch}} V_{\text{ch}} = Q_{\text{dis}} \left( V_{\text{dis}} - \frac{V_{\text{ch}}}{CE} \right) \quad (1)$$

$$\mu = \frac{W}{Q_H + Q_{HR}} = \frac{\Delta S \Delta T - E_{\text{loss}}}{|\alpha| T_H Q_C + (1 - \mu_{HR}) \Delta T C_p} \quad (2)$$

**Pure CoHCF:** CE stands for coulombic efficiency. W stands for the energy difference between discharge and charge energy in one cycle.  $C_p$  is the heat capacity of the cell. The coulombic efficiency of pure CoHCF is about 98.57%. The specific heat of CoHCF is  $2.33 \text{ J g}^{-1} \text{K}^{-1}$ . ( $CE = 98.57\%$   $C_p = 2.33 \text{ J g}^{-1} \text{K}^{-1}$ ) The absolute temperature coefficient of the CoHCF based on experiment is  $0.69 \text{ mV K}^{-1}$ . When charged at  $45^\circ\text{C}$  and discharged at  $15^\circ\text{C}$ , the charged capacity( $Q_{ch}$ ) of cell is  $17.12 \text{ mAh g}^{-1}$  and the discharged capacity( $Q_{dis}$ ) of cell is  $16.87 \text{ mAh g}^{-1}$ . So, we can calculate the coulombic efficiency of the cell. The average discharge voltage of the cell is  $629.90 \text{ mV}$  and the average charge voltage of the cell is  $622.00 \text{ mV}$ . Based on a hypothetical higher coulombic efficiency of 99.72% (CE of 99.72% is chosen which is reasonable after further optimization, as demonstrated in literature[1]), the heat-to-electricity conversion efficiency is discussed detailed. According to formula (1):

$$W = 16.87 \text{ mAh g}^{-1} \times \left( 629.90 \text{ mV} - \frac{622.00 \text{ mV}}{99.72\%} \right) = 0.1038 \text{ mWh g}^{-1}$$

$$Q_H = |\alpha| T_H Q_C = 0.69 \text{ mV K}^{-1} \times 318 \text{ K} \times 17.12 \text{ mAh g}^{-1} = 3.76 \text{ mWh g}^{-1}$$

$$C_p \times \Delta T = 2.33 \text{ J g}^{-1} \text{ K}^{-1} \times 30 \text{ K} = 69.9 \text{ J K}^{-1} = 19.4 \text{ mWh g}^{-1}$$

$$\text{When recovery rate is 50\%, } \eta = \frac{0.1038 \text{ mWh g}^{-1}}{3.76 \text{ mWh g}^{-1} + 19.4 \text{ mWh g}^{-1}(1-0.5)} = 0.77\%$$

| $\mu_{HR}$   | 0     | 50%   | 70%   |
|--------------|-------|-------|-------|
| <b>CoHCF</b> | 0.45% | 0.77% | 1.08% |

**CoHCF/HCNTs:** The coulombic efficiency of CoHCF/HCNTs is about 96.53%. The specific heat of CoHCF/HCNTs is  $2.17 \text{ J g}^{-1} \text{ K}^{-1}$ . (CE = 96.53%  $C_p = 2.17 \text{ J g}^{-1} \text{ K}^{-1}$ ) The absolute temperature coefficient of the CoHCF/HCNTs based on experiment is  $0.89 \text{ mV K}^{-1}$ . When charged at  $45^\circ \text{C}$  and discharged at  $15^\circ \text{C}$ , the charged capacity ( $Q_{ch}$ ) of the cell is  $20.20 \text{ mAh g}^{-1}$  and the discharged capacity ( $Q_{dis}$ ) of the cell is  $19.50 \text{ mAh g}^{-1}$ . So, we can calculate the coulombic efficiency of the cell. The average discharge voltage of the cell is  $605.30 \text{ mV}$  and the average charge voltage of the cell is  $589.20 \text{ mV}$ . Based on a hypothetical higher coulombic efficiency of 99.72%, the heat-to-electricity conversion efficiency is discussed detailed. According to formula (1):

$$W = 19.50 \text{ mAh g}^{-1} \times (605.30 \text{ mV} - \frac{589.20 \text{ mV}}{99.72\%}) = 0.2818 \text{ mWh g}^{-1}$$

$$Q_H = |\alpha| T_H Q_C = 0.89 \text{ mV K}^{-1} \times 318 \text{ K} \times 20.20 \text{ mAh g}^{-1} = 5.71 \text{ mWh g}^{-1}$$

$$C_p \times \Delta T = 2.17 \text{ J g}^{-1} \text{ K}^{-1} \times 30 \text{ K} = 65.1 \text{ J K}^{-1} = 18.1 \text{ mWh g}^{-1}$$

$$\text{When recovery rate is 50\%, } \eta = \frac{0.2818 \text{ mWh g}^{-1}}{5.71 \text{ mWh g}^{-1} + 18.1 \text{ mWh g}^{-1}(1-0.5)} = 1.91\%$$

| $\mu_{HR}$         | 0     | 50%   | 70%   |
|--------------------|-------|-------|-------|
| <b>CoHCF/HCNTs</b> | 1.18% | 1.91% | 2.53% |

Table S1 Calculation of Conversion Efficiency at different  $\mu_{\text{HR}}$ 

|            |               |              |                        |        |                |                       | conversion efficiency at different $\mu_{HR}$ |       |       |
|------------|---------------|--------------|------------------------|--------|----------------|-----------------------|-----------------------------------------------|-------|-------|
| species    | $V_{dis}(mV)$ | $V_{ch}(mV)$ | $Q_{dis}(mAh\ g^{-1})$ | CE     | $W(mWhg^{-1})$ | $C_P \times \Delta T$ | 0                                             | 50%   | 70%   |
| CoHCF      | 629.90        | 622.00       | 16.87                  | 99.72% | 0.1038         | 19.4                  | 0.45%                                         | 0.77% | 1.08% |
| CoHCF/HCNT | 605.30        | 589.20       | 19.50                  | 99.72% | 0.2816         | 18.1                  | 1.18%                                         | 1.90% | 2.52% |

**Table S2.** A survey of performance comparison

| <b>Description</b> | <b>Specific<br/>Capacity<br/>(mAh g<sup>-1</sup>)</b> | <b>Specific Heat<br/>(J g<sup>-1</sup>K<sup>-1</sup>)</b> | <b>Temperature<br/>Coefficient<br/>(mV K<sup>-1</sup>)</b> |
|--------------------|-------------------------------------------------------|-----------------------------------------------------------|------------------------------------------------------------|
| CoHCF              | 18.4 mAh g <sup>-1</sup><br>at 40 mA g <sup>-1</sup>  | 2.33                                                      | -0.69                                                      |
| HCNTs              | 68 F g <sup>-1</sup><br>at 1 A g <sup>-1</sup>        | 1.25                                                      | -0.43                                                      |
| CoHCF/HCNTs        | 18.5 mAh g <sup>-1</sup><br>at 40 mA g <sup>-1</sup>  | 2.17                                                      | -0.89                                                      |

[1] Y. Yang, J. Loomis, H. Ghasemi, S.W. Lee, Y.J. Wang, Y. Cui, G. Chen, Membrane-free battery for harvesting low-grade thermal energy, Nano letters, 14 (2014) 6578-6583.
